# Supplementary material
Source: Springer Nature journal article supplement (https://www.springermedizin.de/resource/supplementary/12865_2009_248_MOESM5_ESM.pdf/9427594)

4.8 kb

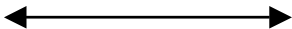

HindIII

HindIII

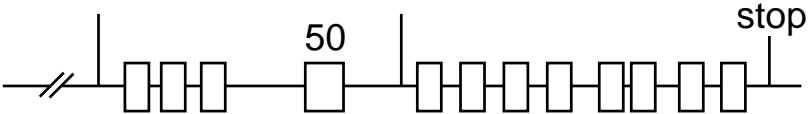

***WT***

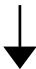

6.9 kb

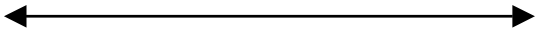

HindIII

HindIII

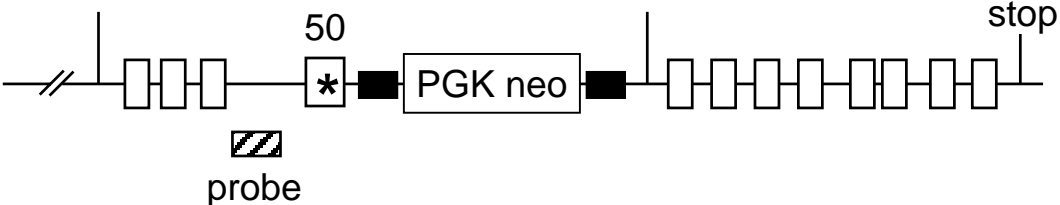

***Targeted Allele***

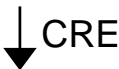

HindIII

HindIII

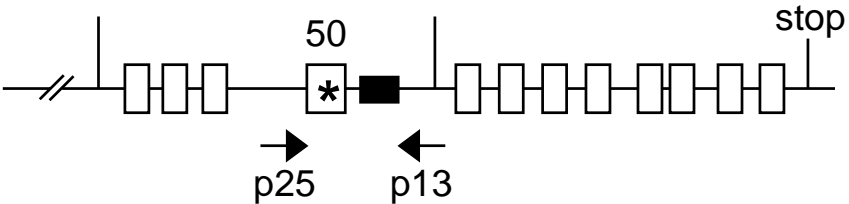

***Knock-In Allele***

Supplement: MOESM5 [file 9427594]
